# Supplementary material for: Non-covalent conjugates of single-walled carbon nanotubes and folic acid for interaction with cells over-expressing folate receptors
Source: Royal Society of Chemistry journal article supplement (doi:10.1039/c2tb00434h), 2013-01-01
Supplement: c2tb00434h.pdf [file c2tb00434h.pdf]

## Non-covalent conjugate of single-walled carbon nanotubes and folic acid for interaction with cells over-expressing folate receptors

John J. Castillo<sup>a</sup>, Tomas Rindzevicius<sup>b</sup>, Leidy V. Novoa<sup>c</sup>, Winnie E. Svendsen<sup>b</sup>, Noemi Rozlosnik<sup>b</sup>, Anja Boisen<sup>b</sup>, Patricia Escobar<sup>c</sup>, Fernando Martínez O.<sup>a</sup>, Jaime Castillo-León<sup>b\*</sup>

<sup>a</sup> Centro de Investigaciones en Catálisis, Universidad Industrial de Santander, Sede Guatiguará UIS Km 2 vía Refugio, Piedecuesta, Colombia

<sup>b</sup> Department of Micro- and Nanotechnology, Technical University of Denmark, Lyngby 2800, Denmark, Tel: +45 4525 6837; E-mail: [jaic@nanotech.dtu.dk](mailto:jaic@nanotech.dtu.dk)

<sup>c</sup> Centro de Investigaciones en Enfermedades Tropicales, Universidad Industrial de Santander, Sede Guatiguará UIS Km 2 vía Refugio, Piedecuesta, Colombia

### Interaction of SWCNT-FA with a folate receptors negative cell line

For this experiment Vero cells (ATCC) which are cells isolated from the kidney of an African green monkey and do not over-express folate receptors were used. Vero cells were maintained in culture medium 1640 (Gibco) supplemented with 5% to SBFI 37°C, 5% CO<sub>2</sub> and 95% humidity and were incubated with SWCNT-FA with a concentration of 0.25 mg/mL during a period of 24, 48 and 72 hours.

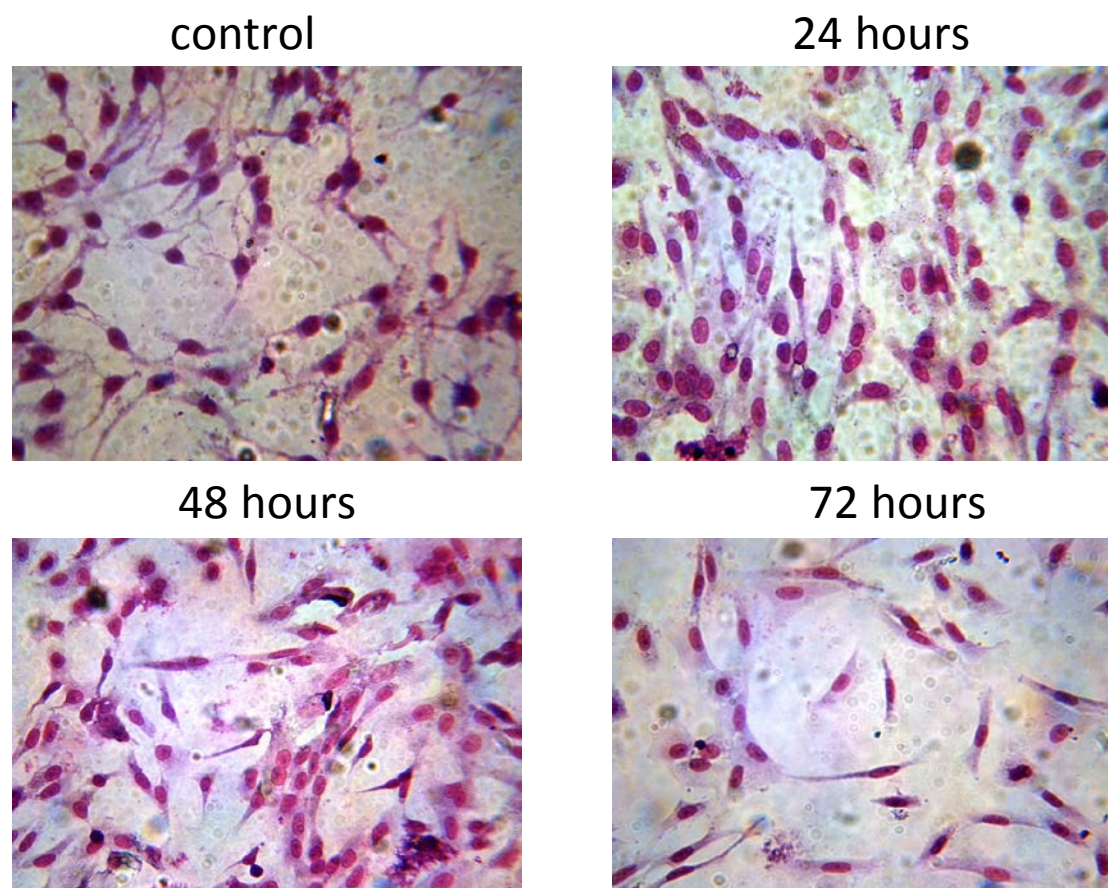

**Figure S1.** Interaction of SWCNT-FA with Vero cells a FR negative cell line. No SWCNT-FA was observed inside Vero cells.
